# Supplementary material
Source: MDPI journal article supplement (https://www.mdpi.com/2624-7402/6/1/14)
Supplement: s1 [file s1]

SUPPLEMENTARY DATA

**Table S1.** Air concentration values ( $\text{mg m}^{-3} \pm \text{standard error}$ ) of PM in the tested area with hedges of different size.

| Distance of<br>the gas exit<br>from the<br>fan | Fraction<br>size | Rows<br>of<br>plants | Distance from the fan (distance from the hedge) m |            |        |            |        |            |         |            |
|------------------------------------------------|------------------|----------------------|---------------------------------------------------|------------|--------|------------|--------|------------|---------|------------|
|                                                |                  |                      | 7 (1)                                             |            | 10 (4) |            | 15 (9) |            | 20 (14) |            |
| 4.5                                            | PM <sub>4</sub>  | 0                    | 3.00                                              | $\pm$ 0.09 | 0.40   | $\pm$ 0.02 | 0.28   | $\pm$ 0.02 | 0.14    | $\pm$ 0.02 |
|                                                |                  | 1                    | 2.37                                              | $\pm$ 0.07 | 0.19   | $\pm$ 0.02 | 0.14   | $\pm$ 0.01 | 0.09    | $\pm$ 0.01 |
|                                                |                  | 2                    | 3.48                                              | $\pm$ 0.11 | 0.07   | $\pm$ 0.00 | 0.11   | $\pm$ 0.01 | 0.11    | $\pm$ 0.00 |
|                                                |                  | 3                    | 1.38                                              | $\pm$ 0.05 | 0.34   | $\pm$ 0.02 | 0.16   | $\pm$ 0.01 | 0.07    | $\pm$ 0.01 |
|                                                | TSP              | 0                    | 1.09                                              | $\pm$ 0.09 | 0.37   | $\pm$ 0.02 | 0.21   | $\pm$ 0.01 | 0.14    | $\pm$ 0.01 |
|                                                |                  | 1                    | 1.19                                              | $\pm$ 0.08 | 0.48   | $\pm$ 0.03 | 0.15   | $\pm$ 0.01 | 0.09    | $\pm$ 0.01 |
|                                                |                  | 2                    | 0.95                                              | $\pm$ 0.07 | 0.38   | $\pm$ 0.05 | 0.05   | $\pm$ 0.00 | 0.13    | $\pm$ 0.01 |
|                                                |                  | 3                    | 0.56                                              | $\pm$ 0.08 | 0.14   | $\pm$ 0.02 | 0.21   | $\pm$ 0.01 | 0.08    | $\pm$ 0.00 |
| 2.7                                            | TSP              | 0                    | 0.47                                              | $\pm$ 0.04 | 0.27   | $\pm$ 0.03 | 0.18   | $\pm$ 0.01 | 0.21    | $\pm$ 0.01 |
|                                                |                  | 1                    | 0.77                                              | $\pm$ 0.04 | 0.14   | $\pm$ 0.03 | 0.10   | $\pm$ 0.01 | 0.10    | $\pm$ 0.01 |
|                                                |                  | 2                    | 0.47                                              | $\pm$ 0.03 | 0.20   | $\pm$ 0.02 | 0.14   | $\pm$ 0.01 | 0.13    | $\pm$ 0.02 |
|                                                |                  | 3                    | 0.61                                              | $\pm$ 0.03 | 0.07   | $\pm$ 0.01 | 0.12   | $\pm$ 0.01 | 0.39    | $\pm$ 0.02 |
